# Supplementary material for: Improved RepVGG Ground-Based Cloud Image Classification with Attention Convolution
Source: Copernicus journal article supplement (doi:10.5194/egusphere-2023-1094), 2023-07-25
Supplement: Supplementary file [file egusphere-2023-1094-AC2-supplement.zip]

# 1 Improved RepVGG Ground-Based Cloud Image Classification 2 with Attention Convolution

3 Chaojun Shi<sup>1, 2</sup>, Leile Han<sup>1</sup>, Ke Zhang<sup>1, 2</sup>, Hongyin Xiang<sup>1, 2</sup>, Xingkuan Li<sup>1</sup>, Zibo Su<sup>1</sup>, and Xian  
4 Zheng<sup>1</sup>

5 <sup>1</sup>Department of Electronic and Communication Engineering, North China Electric Power University, Baoding 071003,  
6 China

7 <sup>2</sup>Hebei Key Laboratory of Power Internet of Things Technology, North China Electric Power University, Baoding  
8 Hebei 071003, China

9 *Correspondence to:* Chaojun Shi ([scj@ncepu.edu.cn](mailto:scj@ncepu.edu.cn)) and Hongyin Xiang ([66283880@qq.com](mailto:66283880@qq.com))

10 **Abstract.** Atmospheric clouds greatly impact the Earth’s radiation prediction, hydrological cycle, and climate change.  
11 Accurate automatic recognition of cloud shape based on ground-based cloud image is helpful to analyze solar  
12 irradiance, water vapor content, and atmospheric motion, and then predict photovoltaic power, weather trends, and  
13 severe weather changes. However, the appearance of clouds is changeable and diverse, and its classification is still  
14 challenging. In recent years, convolution neural network (CNN) has made great achievements in ground-based cloud  
15 image classification. However, traditional CNNs poorly associate long-distance clouds, making the extraction of  
16 global features of cloud images quite problematic. This study attempts to mitigate this problem by elaborating a  
17 ground-based cloud image classification method based on the improved RepVGG convolution neural network and  
18 attention mechanism. Firstly, the proposed method increases the RepVGG residual branch and obtains more local  
19 detail features of cloud images through small convolution kernels. Secondly, an improved channel attention module  
20 is embedded after the residual branch fusion, effectively extracting the global features of cloud images. Finally, the  
21 linear classifier is used to classify the ground cloud images. Finally, the warm-up method is applied to optimize the  
22 learning rate in the training stage of the proposed method, making it lightweight in the inference stage and thus  
23 avoiding overfitting and accelerating the model’s convergence. The proposed method is validated on MGCD and  
24 GRSCD ground-based cloud image datasets, with the respective classification accuracy values of 98.15 and 98.07%,  
25 outperforming those of ten most advanced methods used as the reference. The results obtained are considered  
26 instrumental in ground-based cloud image classification.

## 27 1. Introduction

28 In meteorology, cloud is an aerosol consisting of a visible mass of water droplets, ice crystals, their aggregates or  
29 other particles suspended in the atmosphere. Clouds of different types cover over 70% of the Earth surface (Qu et al.,  
30 2021; Gyasi and Swarnalatha, 2023; Fabel et al., 2022). Cloud analysis plays a crucial role in meteorological

observation because clouds can affect the Earth's water cycle, climate change, and solar irradiance (Gorodetskaya et al., 2015; Goren et al., 2018; Zheng et al., 2019). Cloud observation methods mainly include satellite observation (Norris et al., 2016; Zhong et al., 2017; Li et al., 2023) and ground observation (Calbó and Sabburg, 2008; Nouri et al., 2019; Lin et al., 2023). Satellite observation refers to the distribution, movement, and change of clouds observed by high-resolution remote sensing satellites from the perspective of the outside to the inside. When observing local sky areas, its decimeter-level observation performance cannot obtain a sufficient resolution to describe the characteristics of different clouds blending in detail (Long et al., 2023; Sarukkai et al., 2020). Compared with satellite observation, ground-based observation opens up a new way to monitor and understand regional sky conditions. Its equipment can not only observe local sky areas but also capture ground-based cloud images with higher resolution. The observation effect is shown in Figure 1.

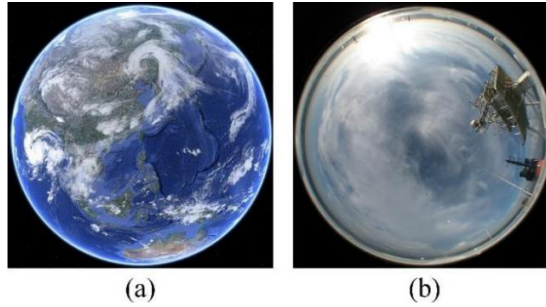

**Figure 1: Satellite cloud and Ground-based cloud observation images: (a) Satellite cloud image. The picture is from the National Satellite Meteorological Center: <http://www.nsmc.org.cn/>; (b) Ground-based cloud image (Johnson et al., 1989).**

Typical ground-based cloud observation instruments include All-Sky Imager (ASI) (Shi et al., 2019; Cazorla et al., 2008), Total Sky Imager (TSI) (Johnson et al., 1989; Tang et al., 2021), etc. The relevant equipment and ground-based cloud images are shown in Figure 2.

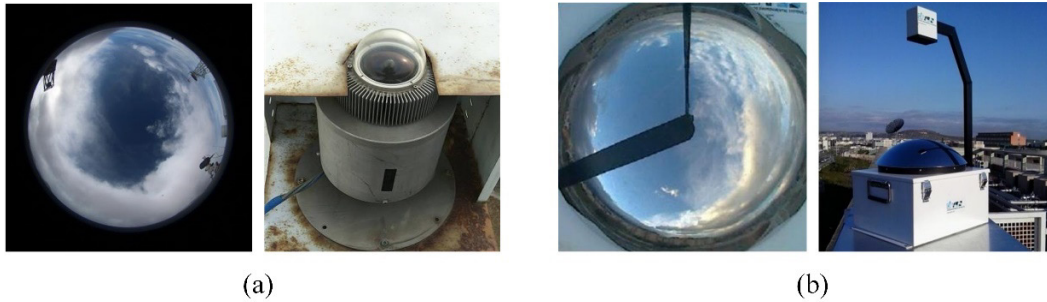

**Figure 2: Two kinds of ground-based cloud images and their observation equipment: (a) TSI ground-based cloud image and its observation equipment (Johnson et al., 1989); (b) ASI ground-based cloud image and its observation equipment (Cazorla et al., 2008).**

Ground-based cloud observation can obtain more obvious cloud characteristics by observing the information at the bottom of the cloud, which is conducive to assisting the prediction of local photovoltaic power generation. Clouds play an important role in maintaining the atmospheric radiation budget balance by suppressing short-wave and long-

54 wave solar radiation (Taravat et al., 2015). Pv power prediction is affected by multiple factors such as cloud genus,  
55 cloud cover change, solar irradiance, and solar cell performance in local areas, among which cloud genus is an  
56 important factor affecting PV power prediction (Zhu et al., 2022). Therefore, it is of great significance to accurately  
57 obtain sky cloud information through cloud observation and then accurately classify clouds for accurate prediction of  
58 photovoltaic power generation (Alonso-Montesinos et al., 2016). The traditional ground-based cloud observation  
59 method is mainly manual observation, which relies heavily on the experience of observers, cannot achieve  
60 standardization, and has low efficiency. Therefore, ground-based cloud automatic observation has been widely  
61 concerned by scholars. In recent years, with the development of digital image acquisition devices, many ground-based  
62 whole-sky cloud image acquisition devices have emerged at home and abroad, providing massive data support for  
63 automatic ground-based cloud observation (Pfister et al., 2003).

64 Ground-based cloud image classification is an important part of the foundation of automatic cloud observation and  
65 is the key to climate change and photovoltaic power prediction. The classification of ground-based cloud images  
66 mainly classifies each cloud image taken from the ground into the corresponding cloud genus by extracting cloud  
67 image features, such as cirrus, cumulus, stratus, stratus nimbus, etc. According to different cloud image feature  
68 extraction methods, the ground-based cloud image classification method is divided into based on traditional machine  
69 learning method and based on deep learning method (Hu et al., 2018). Most of the ground-based cloud image  
70 classification methods based on traditional machine learning classify cloud images by artificially designing cloud  
71 image features, while the ground-based cloud image classification methods based on deep learning mainly classify  
72 cloud images through self-learning cloud image features of deep neural network (DNN) (Wu et al., 2019).

73 Early ground-based cloud image classification studies relied on manual classification methods, which focused on  
74 features such as texture, structure, and color, combined with traditional machine learning methods to classify ground-  
75 based cloud images. These methods include a decision tree, K-nearest neighbor (KNN) classifier, support vector  
76 machine (SVM), etc. (Singh and Glennen, 2005) proposed a method for automatically training the texture function of  
77 a cloud classifier. In this method, five feature extraction methods including autocorrelation, co-occurrence matrix,  
78 edge frequency, Laws texture analysis, and original length are used respectively. Compared with other cloud  
79 classification methods, this method has the advantages of high accuracy and fast classification speed, but its  
80 classification ability for mixed clouds is insufficient. (Heinle et al., 2010) described cloud images by using spectral  
81 features (mean value, standard deviation, skewness, and difference) and texture features (energy, entropy, contrast,  
82 homogeneity, and cloud cover), and combined with a KNN classifier, divided ground cloud images into seven  
83 categories. In addition, (Zhuo et al., 2014) reported that the spatial distribution of contour lines could represent the  
84 structural information of cloud shapes, used the central description pyramid to simultaneously extract the texture and  
85 structural features of ground-based cloud images, and used SVM and KNN to classify cloud images. It can be seen  
86 that the traditional classification method of ground-based cloud images based on machine learning mainly uses hand-  
87 designed texture, structure, color, shape, and other features to extract, and obtains high-dimensional feature expression

of ground-based cloud images through single feature or fusion feature. Traditional machine learning methods mostly describe the features from the perspective of digital signal analysis and mathematical statistics, but ignore the representation and interpretation of the visual features of the cloud image itself.

In recent years, under the background of cross-integration of different disciplines and artificial intelligence, the ground-based cloud image classification method based on deep learning has become a research hotspot with its superior classification performance. Aiming at the unique characteristics of ground-based cloud images, (Shi et al., 2017) proposed Deep Convolutional Activations-Based Features (DCAFs) to classify ground-based cloud images, and the results are better than the artificially designed cloud image features. Alternatively, (Ye et al., 2017) used CNN to extract cloud image features and proposed a local pattern mining method based on ground-based cloud images to optimize the local features of cloud images and improve the classification accuracy of cloud images. Zhang et al. (2018a) put the wake cloud as a new genus of cloud into the ground-based cloud image database for the first time, proposed a ground-based cloud image classification method based on CloudNet, and improved the classification accuracy of the ground-based cloud images. More recently, (Wang et al., 2020) proposed an improved CloudA network based on AlexNet. The classification accuracy on the Singapore Whole-Sky Imaging Categories (SWIMCAT) ground-based cloud image dataset exceeded the traditional ground-based cloud image classification methods. Liu et al. (2020b) proposed Multi-Evidence and Multi-Modal Fusion Networks (MMFN) by fusing heterogeneous features, local visual features, and multi-mode information, which significantly improves the classification accuracy of cloud images. Aiming at the problem that the traditional neural network has insufficient ability to classify the ground-based cloud images within and between genera, (Zhu et al., 2022) proposed to use of an improved combined convolutional neural network to classify the cloud images, and the classification accuracy is greatly improved compared with the traditional neural network. Alternatively, (Yu et al., 2021) used two sub-convolutional neural networks to extract features of ground-based cloud images and used weighted sparse representation coding to classify them, which solved the problem of occlusion in multi-mode ground-based cloud image data and greatly improved the robustness of cloud images classification. Liu et al. (2020a) introduced a ground-based cloud image classification method based on a graph convolution network (GCN). However, the weight assigned by GCN failed to accurately reflect the importance of connection nodes, thus reducing the discrimination of aggregated cloud image features. To make up for this deficiency, (Liu et al., 2022) proposed a context attention network for ground-based cloud classification and publicly released a new cloud classification dataset. In addition, Liu et al. (2020c) further combined CNN and GCN to propose a multimodal ground-based cloud image classification method based on heterogeneous deep feature learning. Alternatively, (Wang et al., 2021) elaborated a ground-based cloud image classification method based on Transfer Convolutional Neural Network (TCNN) by combining deep learning and transfer learning. (Li et al., 2022) further enhanced the classification performance of ground-based cloud images based on the improved Vision Transformer combined with the EfficientNet-CNN. Being based on deep learning, this classification method significantly outperformed the traditional machine learning methods.

CNN plays an important role in the field of target detection, image classification, and image segmentation, especially in the tasks of power line fault detection (Zhao et al., 2016), face recognition (Meng et al., 2021), and medical image segmentation (Zhang et al., 2021), and has been widely used and achieved great achievements. Ground-based cloud image classification is an emerging task in the field of image classification and has achieved rapid and considerable development based on the CNN method. However, it still has some shortcomings such as shallow network level of ground-based cloud image classification method, limited ground-based cloud image classification performance, and small ground-based cloud image classification dataset, which cannot verify the generalization ability of large-scale ground-based cloud image classification dataset.

To solve the above problems, the current study improved the RepVGG (Ding et al., 2021) and used it as a basis for elaborating a new classification method for ground-based cloud images called CloudRVE (Cloud Representative Volume Element Network). In this method, the ground-based cloud image was incorporated into the CNN model, and its image features were extracted. Multi-branch convolution layer and channel attention module were used to capture local and global features of the cloud image simultaneously time to enhance the classification performance of ground-based cloud images. The method's application to the multi-modal ground-based cloud dataset named MGCD (Liu et al., 2020a) and ground-based remote sensing cloud database (GRSCD) (Liu et al., 2020b) proved its superiority over several state-of-the-art subsoil cloud image classification methods. The main contributions of this paper are as follows:

- (1) This study elaborated the Improved RepVGG ground-based cloud image classification method with attention convolution called CloudRVE. It broadened the residual structure and comprehensively combined the attention mechanism's abilities to extract the cloud image's global features and describe in detail its local features in the classification process.
- (2) In particular, the Efficient Channel Attention network (ECA) was improved and incorporated into the feature extraction process of ground-based cloud images, which optimization occurred through local cross-channel interaction without dimensionality reduction. Besides, the structural re-parameterization in the inference stage was performed, reducing the model complexity, improving the feature extraction performance, and enhancing the network's learning ability of ground-based cloud image features.
- (3) The comparative analysis of experimental results on the ground-based cloud image classification dataset MGCD proved that the proposed method outperformed ten other state-of-the-art methods in classification accuracy. Its application to GRSCD dataset further verified its generalization ability. Finally, the proposed method's training process optimization and dynamical adjustment of its learning rate were provided by the warm-up method, and the respective recommendations were drawn.

The rest of this paper is organized as follows. Section 2 elaborates on the structure and composition of the proposed CloudRVE method for classifying ground cloud images. Section 3 briefly introduces the ground cloud image classification datasets used in this paper and the model evaluation indices. Section 4 provides the experimental results

and discusses the feasibility and effectiveness of the proposed method. Finally, Section 5 concludes the study and outlines future research directions and practical application of the research results.

## 2. Methods

### 2.1 Overview of Method

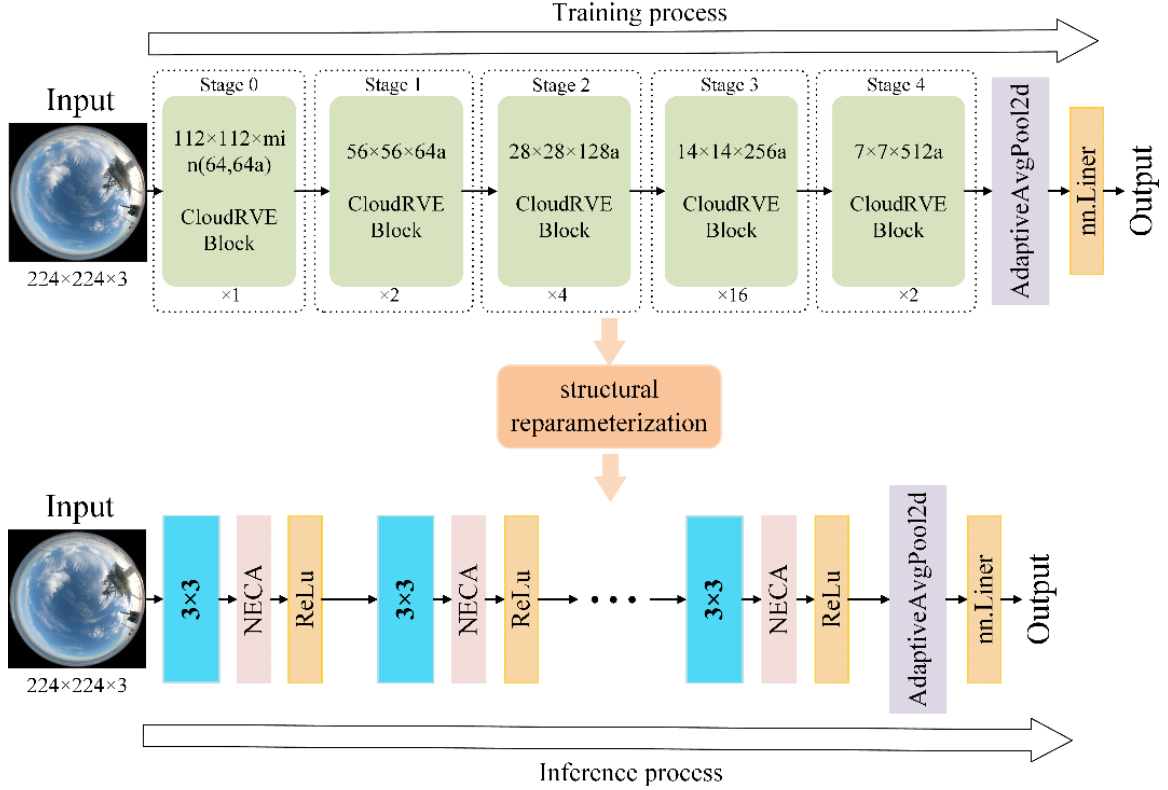

**Figure 3: CloudRVE network framework. Ground-based cloud images come from Kiel-F datasets (Kalisch and Macke, 2008).**

This section shows the overall architecture of the proposed RepVGG-based improved classification method, as shown in Figure 3. In the CloudRVE training process, CloudRVE Block with a multi-branch topology structure is used to extract features of ground-based cloud images. The multi-branch topology structure has rich gradient information and a complex network structure, which can effectively improve the characterization ability of local feature information of ground-based cloud images. Feature maps extracted by CloudRVE Block enter the New Efficient Channel Attention (NECA) network and learn the feature relationships between sequences to obtain the global feature representation of an image. In addition, the warm-up method is incorporated into the CloudRVE training process to dynamically optimize the learning rate and accelerate the model parameter convergence to enhance the model training effect.

CloudRVE inference process uses the single branch topology structure of VGG-style (Simonyan and Zisserman, 2015), and through structural re-parameterization, the multi-branch convolutional layer and batch normalization (BN) (Ioffe and Szegedy, 2015) are converted into a  $3\times 3$  convolutional layer, increasing its inference speed. The CloudRVE training process and inference process use the linear classifier to classify the ground-based cloud images to get the final result. The specific framework parameter information of the model is shown in Table 1, where  $a$  and  $b$  are magnification factors used to control the network width. The specific contents of each part are as follows.

Table 1. The details of CloudRVE training architecture.

| Stage | Blocks of each stage | Output size     | Output channels |
|-------|----------------------|-----------------|-----------------|
| 1     | 1                    | $224\times 224$ | Min (64, 64a)   |
| 2     | 2                    | $112\times 112$ | 64a             |
| 3     | 4                    | $56\times 56$   | 128a            |
| 4     | 14                   | $28\times 28$   | 256a            |
| 5     | 1                    | $14\times 14$   | 512b            |

## 2.2 Broadening the CloudRVE Block of Residual Structure

Before the machine learning technology became mature, the classification of ground-based cloud images used hand-made features or shallow learning strategies, which took a long time and had poor accuracy (Xiao et al., 2016). With the continuous development of deep learning, CNN has been gradually applied to the task of ground-based cloud image classification and has become the mainstream method. CNN is a deep learning model including convolution calculation, including feedforward neural network, which has representation learning ability, similar to artificial neural network multilayer perceptron (Shi et al., 2017). In 2014, the most representative convolution neural network VGG came out, which adopted a single-branch topology structure, greatly improved the image processing effect and model inference speed, and became a new direction for scholars to learn and develop. With the in-depth study of the VGG, its potential in image processing is close to saturation. Scholars realize that the VGG has some shortcomings such as simple network structure, few network layers, and large parameters, which makes it difficult to extract high-order features of images and has limited image-processing performance. Therefore, improving network complexity and increasing the number of network layers has become a new research direction. The ResNet developed by (He et al., 2016) differed from the traditional neural network stacked by convolution layer and pooling layer. The network was stacked by residual modules, which not only increased the complexity of the network structure and reduced the number of network parameters, but also perfectly solved the problem of gradient disappearance or gradient explosion caused by increasing the number of network layers, which could extract abstract image features with semantic information and effectively improve image-processing performance. By improving the complexity and depth of the network, the ResNet could train the CNN model with higher accuracy, but there were numerous redundancies in its

residual network, impeding the network inference speed and reducing the accuracy of image processing results (Szegedy et al., 2015). Therefore, increasing the complexity and depth of the network, weakening its influence on inference speed, and improving the classification effect of ground-based cloud images become the key goals of this study.

To improve the classification effect of the ground-based cloud images, the CloudRVE training process is composed of CloudRVE blocks that adopt the multi-branch topology. The CloudRVE Block contains four branches and the improved channel attention module NECA. Its main branch contains a convolutional layer with a convolution kernel size of  $3 \times 3$ , which can inspect the input images with a larger neighborhood scope and extract global features easily. Ground-based cloud images contain abundant cloud shape and cloud amount information, while a large convolution kernel tends to ignore cloud boundary features, resulting in inadequate feature extraction from ground-based cloud images. Therefore, the two bypass branches of CloudRVE Block adopt the convolution layer with the convolution kernel size of  $1 \times 1$ , which can not only extract fine cloud boundary features and abstract cloud cover features but also keep the output dimension consistent with the input dimension, facilitating the multi-branch ground-based cloud image feature fusion. The third bypass branch of CloudRVE Block adopts the Identity branch, whose purpose is to take the input as the output and change the learning objective to the residual result approaching 0 so that the accuracy does not decline with the deepening of the network. In addition, each branch is connected to the BN layer, not only to avoid overfitting but also to prevent gradient disappearance or explosion. The specific structure of CloudRVE Block is shown in Figure 4. The input feature maps pass through three branches with a convolutional layer and BN layer at the same time. The output obtained by the input feature maps is summed with the Identity branch and input into the NECA module to obtain the final output feature.

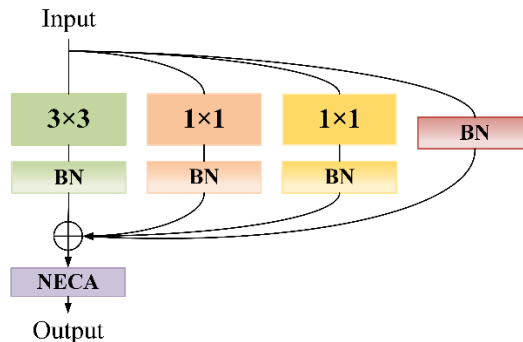

**Figure 4: CloudRVE Block structure.**

### 2.3 NECA Module Focusing on Full Image Features

The attention mechanism is to let the neural network have the information processing way to distinguish the key points and to capture the connection between global information and local information flexibly. Its purpose is to enable the model to obtain the target region that needs to be focused on, put more weight on this part, highlight significant useful



features, and suppress and ignore irrelevant features. The NECA (New Efficient Channel Attention) is an implementation form of channel attention mechanism, which can strengthen channel features without changing the size of the input feature maps. It adopts a local cross-channel interaction strategy without dimensionality reduction so that the  $1 \times 1$  convolution layer can replace the full connection layer to learn channel attention information, which can effectively avoid the negative impact of dimensionality reduction on channel attention learning. The network performance is guaranteed and the complexity of the model is significantly reduced.

The ground-based cloud image samples in Figure 2 were taken by the all-sky imager and could cover the sky in this area. However, the ground-based cloud images contain not only the valid area of the whole sky but also the black invalid area. Therefore, the NECA module abandons the traditional global maximum pooling and adopts double global average pooling. The global average pooling formulas are as follows:

$$\gamma_{gap} = \frac{1}{wh} \sum_{i=1, j=1}^{w, h} X_{ij}, X \in R^{w \times h \times c}, \quad (1)$$

$$\eta_{gap} = \sigma(V_k^{gap} \gamma_{gap}), V_k^{gap} \in R^{c \times c}, \quad (2)$$

where  $X$  and  $X'$  represent the input and output feature maps, respectively, whereas  $w$ ,  $h$ , and  $c$  are the width, height, and number of channels of the input feature map. The NECA module adopts a double global average pool, which can effectively improve its noise suppression ability and enhance its channel feature extraction ability, which can avoid the black invalid part of the feature calculation. The NECA module structure is shown in Figure 5.

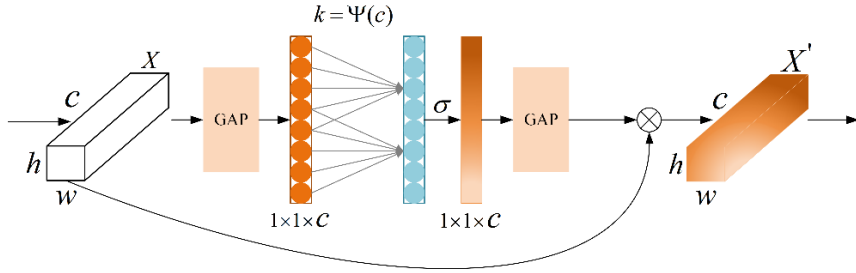

**Figure 5: NECA model structure.**

Here  $b$  and  $r$  are fixed values, and their values are set to 1 and 2, respectively, while  $k$  represents the convolution kernel size and has a corresponding relationship with  $c$ . As the network deepens, the number of channels  $c$  increases by the power of 2. Therefore,  $k$  should not be a fixed value, but a dynamic change and its relationship are as follows:

$$C = \phi(k) = 2^{(\gamma * k - b)} \quad (3)$$

$$K = \psi(C) = \left\lfloor \frac{\log_2(c)}{r} - \frac{b}{r} \right\rfloor_{\text{odd}} \quad (4)$$

## 2.4 Inference Process from Multi-Branch to Single-Branch

The residual module is crucial to the CloudRVE training process. Its multi-branch topology can improve CloudRVE Block's ability to extract ground cloud image features and solve optimization problems such as gradient disappearance and gradient explosion caused by increasing network depth. However, the multi-branch topology will occupy more memory for the CloudRVE reasoning process, resulting in insufficient utilization of hardware computing power and slower reasoning speed. If the single-branch topology is adopted, the computing load is reduced and the inference time is saved, thus reducing memory consumption. Therefore, the single-branch topology structure is adopted in the CloudRVE inference stage, and the trained CloudRVE Block needs to be transformed into a single-branch topology model through structural re-parameterization. The conversion process mainly includes the fusion of the convolutional layer and BN layer, the conversion of the BN layer into a convolutional layer, and the fusion of the multi-branch convolutional layer. We use  $W_{(3)} \in R^{C_1 \times C_2 \times 3 \times 3}$  as  $3 \times 3$  convolution layers, and use  $C_1, C_2$  as input channels and output channels respectively, and use  $W_{(1)} \in R^{C_1 \times C_2 \times 1 \times 1}$  as  $1 \times 1$  convolution layers. In addition, we use  $\mu_{(3)}, \sigma_{(3)}, \gamma_{(3)}, \beta_{(3)}$  to represent the mean value, standard deviation, learning scaling factor, and deviation of the BN layer of the main branch, and use  $\mu_{(1)}, \sigma_{(1)}, \gamma_{(1)}, \beta_{(1)}$  to represent the parameters of the BN layer of the by-pass branch containing  $1 \times 1$  convolution layer, and use  $\mu_{(0)}, \sigma_{(0)}, \gamma_{(0)}, \beta_{(0)}$  to represent the parameters of the BN layer of the identity branch, and use  $M_{(1)} \in R^{N \times C_1 \times H_1 \times W_1}, M_{(2)} \in R^{N \times C_2 \times H_2 \times W_2}$  to represent the input and output. The CloudRVE Block structure reparameterization calculation process is as follows:

$$M_{(2)} = \text{BN}(M_{(1)} * W_{(3)}, \mu_{(3)}, \sigma_{(3)}, \gamma_{(3)}, \beta_{(3)}) + \text{BN}(M_{(1)} * W_{(1)}, \mu_{(1)}, \sigma_{(1)}, \gamma_{(1)}, \beta_{(1)}) + \text{BN}(M_{(1)}, \mu_{(0)}, \sigma_{(0)}, \gamma_{(0)}, \beta_{(0)}) \quad (5)$$

The input feature map is inputted into the NECA module through the  $3 \times 3$  convolution layer completed by fusion. The process is shown in Figure 6.

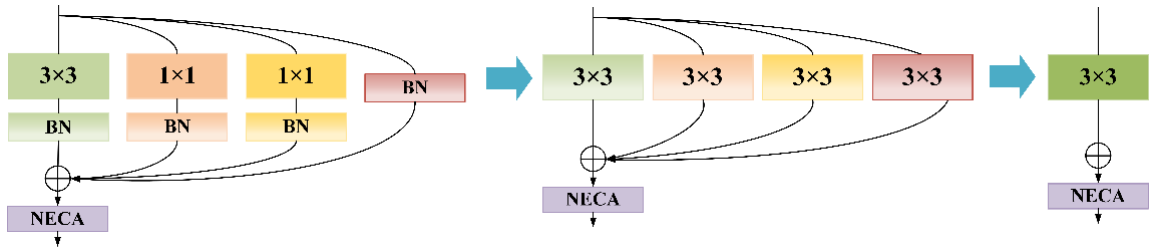

Figure 6: Re-parameterization process of CloudRVE Block structure.

### 2.4.1 Fusion of Convolutional Layer and BN Layer

This section first describes the fusion of the main branch  $3 \times 3$  convolution layer with the BN layer and then describes the transformation of the bypass branch  $1 \times 1$  convolution layer into the  $3 \times 3$  convolution layer and fusion with the BN layer. In the inference stage, the number of convolutional kernel channels in the convolution layer is the same as the

number of channels in the input feature map, and the number of convolutional kernel channels in the output feature map is the same. The main parameters of the BN layer include mean  $\mu$ , variance  $\sigma^2$ , learning ratio factor  $\gamma$ , and deviation  $\beta$ . Of these,  $\mu$  and  $\sigma^2$  are obtained statistically in the training stage, while  $\gamma$  and  $\beta$  are obtained by learning in the training stage. The calculation of the  $i$  channel of the input BN layer is performed as follows:

$$y_i = \frac{x_i - \mu_i}{\sqrt{\sigma_i^2 + \varepsilon}} \times \gamma_i + \beta_i, \quad (6)$$

where  $x$  is the input and  $\varepsilon$  is the constant approaching 0. The calculation process of the  $i$  channel input BN in the feature map can be expressed as follows:

$$bn(M, \mu, \sigma, \gamma, \beta)_{:,i,:} = (M_{:,i,:} - \mu_i) \frac{\gamma_i}{\sigma_i} + \beta_i = \frac{\gamma_i}{\sigma_i} M_{:,i,:} + \beta_i - \frac{\gamma_i}{\sigma_i} \mu_i, \quad (7)$$

where  $M$  is the output feature map obtained by weighted summation of the convolution layer, input to BN layer and ignore  $x$ . Therefore, we can multiply  $\gamma_i/\sigma_i$  to the  $i$  convolution kernel of the  $3 \times 3$  convolution layer:

$$W'_{i,:,:} = \frac{\gamma_i}{\sigma_i} W_{i,:,:} \quad (8)$$

$$b'_i = \beta_i - \frac{\mu_i \gamma_i}{\sigma_i} \quad (9)$$

The  $i$  convolution kernel weight of the fusion of the  $3 \times 3$  convolution layer and BN layer is obtained, and the specific fusion process is shown in Figures 7 and 8. The input channel  $C_1$  and output channel  $C_2$  make two, and the stride is one. In the convolution layer, the input feature map is calculated by convolution to obtain the output feature map with the number of channels 2. Figure 8 shows that the number of channels in the BN layer is 2, and the output feature map of the convolution layer is used as the input feature map of the BN layer. The output feature map with the number of channels being 2 is obtained via equation (2).

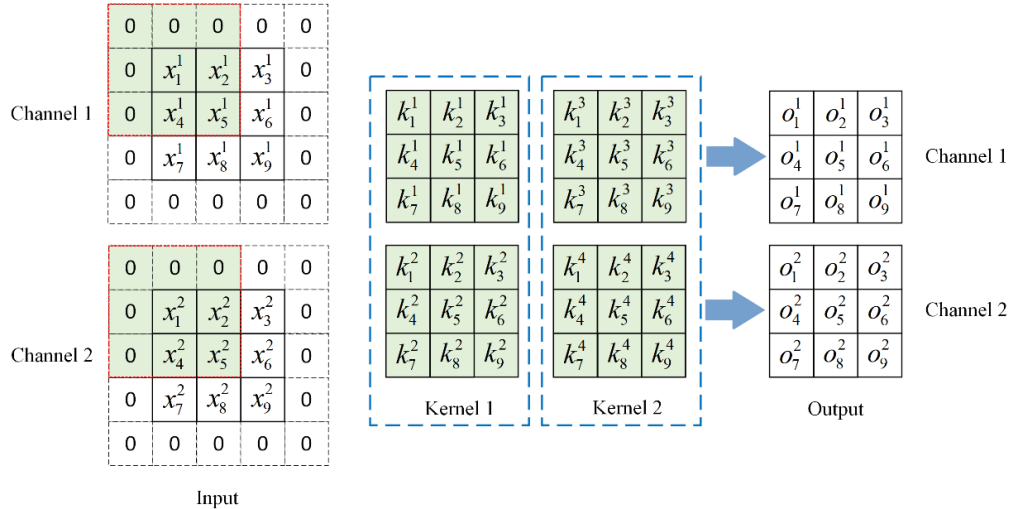

Figure 7: Input feature map through convolution layer process. For visualization, we assume that  $C_1=C_2=2$ .

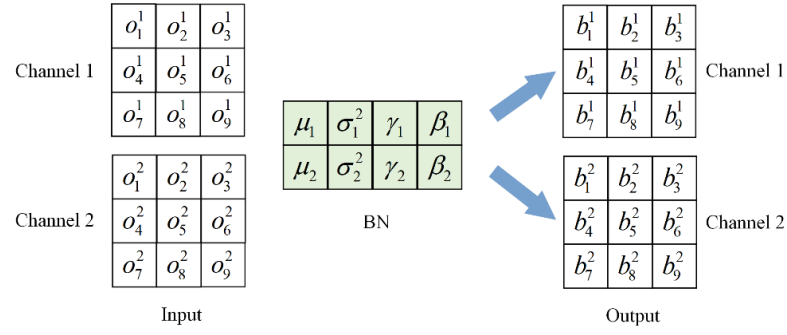

**Figure 8: Convolutional layer output feature map through the BN layer process.**

In addition, to ensure that the size of the output feature map is consistent with that of the input feature map, the input feature map should be converted into  $5 \times 5$  size by padding operation. The concrete convolution is as follows:

$$o_1^1 = x_1^1 \cdot k_5^1 + x_2^1 \cdot k_6^1 + x_4^1 \cdot k_8^1 + x_5^1 \cdot k_9^1 + x_1^2 \cdot k_5^2 + x_2^2 \cdot k_6^2 + x_4^2 \cdot k_8^2 + x_5^2 \cdot k_9^2 \quad (10)$$

The specific calculation process of the input feature map through the BN layer is

$$b_1 = \frac{(x_1^1 \cdot k_5^1 + x_2^1 \cdot k_6^1 + x_4^1 \cdot k_8^1 + x_5^1 \cdot k_9^1 + x_1^2 \cdot k_5^2 + x_2^2 \cdot k_6^2 + x_4^2 \cdot k_8^2 + x_5^2 \cdot k_9^2) - \mu_1}{\sqrt{\sigma^2 + \epsilon}} \cdot \gamma_1 + \beta_1 \quad (11)$$

Re-arranging equation (7) yields

$$b_1 = (x_1^1 \cdot k_5^1 + x_2^1 \cdot k_6^1 + x_4^1 \cdot k_8^1 + x_5^1 \cdot k_9^1 + x_1^2 \cdot k_5^2 + x_2^2 \cdot k_6^2 + x_4^2 \cdot k_8^2 + x_5^2 \cdot k_9^2) \cdot \frac{\gamma_1}{\sqrt{\sigma^2 + \epsilon}} + (\beta_1 - \frac{\mu_1}{\sqrt{\sigma^2 + \epsilon}}) \quad (12)$$

$$c = \frac{\gamma_1}{\sqrt{\sigma^2 + \epsilon}} ; \quad d = \beta_1 - \frac{\gamma_1 \cdot \mu_1}{\sqrt{\sigma^2 + \epsilon}} \quad (13)$$

In equation (8),  $c$  and  $d$  are constants and are multiplied to the first convolution kernel of the convolution layer to obtain the parameters of the first convolution kernel after the convolution layer and BN layer are fused. Other fused convolution kernel parameters are calculated similarly. The convolution layer and BN layer are fused by the bypass branch containing a  $1 \times 1$  convolution layer. The convolution layer is first converted to  $3 \times 3$  size by padding operation and then fused with the BN layer by repeating the above steps. The convolution layer padding process is shown in Figure 9.

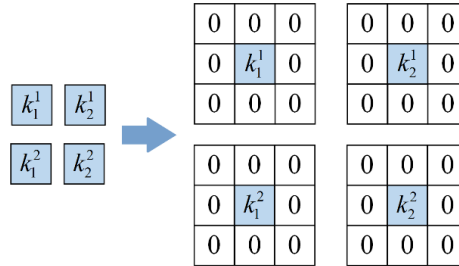

**Figure 9:  $1 \times 1$  convolution layer transformed into  $3 \times 3$  convolution layer.**

### 309 2.4.2 Converting the BN Layer to the Convolution Layer

310 The identity bypass branch has only a BN layer, its function is to ensure the identity mapping of the input feature map  
 311 and output feature map. To realize the identical mapping between the input feature map and the output feature map in  
 312 the fusion process, a  $3 \times 3$  convolution layer with 2 convolution kernels and 2 convolution kernel channels needs to  
 313 be designed. Secondly, the input feature map needs to be converted into a  $5 \times 5$  feature map by padding operation.  
 314 The specific process is shown in Figure 10. The output feature map is obtained by convolution calculation of the input  
 315 feature map, and its parameters and sizes are consistent with those of the input feature map. Finally, the fusion process  
 316 of the  $3 \times 3$  convolution layer and BN layer is repeated to obtain a new  $3 \times 3$  convolution layer.

### 317 2.4.3 Multi-Branch Convolution Layer Fusion

318 The structure re-parameterization transforms each branch into a  $3 \times 3$  convolution layer by construction and fusion,  
 319 which facilitates the fusion of multi-branch convolution layers into a single-branch  $3 \times 3$  convolution. We use  $I$  and  
 320  $O$  to represent the input and output, respectively, while  $K_i$  and  $B_i$  are the convolution kernel weight and bias of the  $i$   
 321 branch. The multi-branch fusion calculation process is as follows:

$$322 \quad O = (I \otimes K_1 + B_1) + (I \otimes K_2 + B_2) + (I \otimes K_3 + B_3) + I \otimes (K_1 + K_2 + K_3) + (B_1 + B_2 + B_3) \quad (14)$$

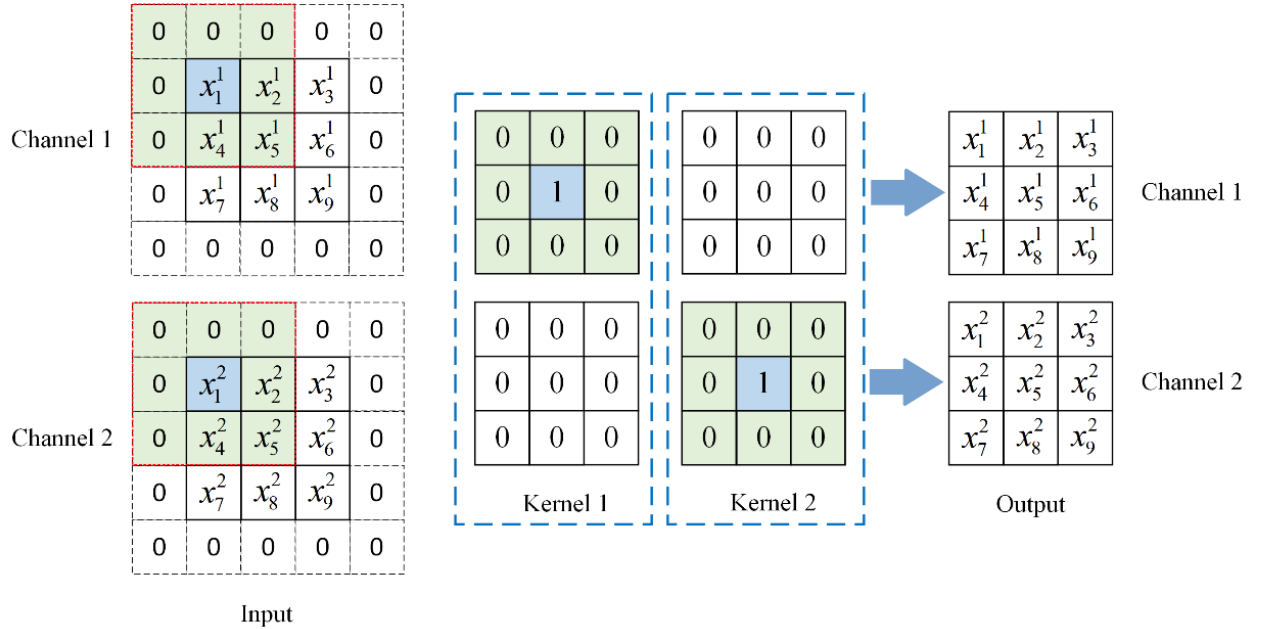

323

324 **Figure 10: Identity branch Identity mapping process.**

## 325 2.5 Warm-Up Method

326 In this paper, the warm-up method (He et al., 2019) is used to optimize the learning rate in the model training process,  
327 so that the learning rate varies in different training stages. In the initial stage of model training, a small learning rate  
328 is selected, which is due to the random initialization of model weights and no prior knowledge of ground-based cloud  
329 image data, and the model will quickly adjust parameters according to the input. If a large learning rate is adopted at  
330 this time, the model will be overfitted and the prediction accuracy of the model will be affected. After training the  
331 model for some time, the learning rate linearly increases to a preset large value and the model has some prior  
332 knowledge, which can avoid overfitting and accelerate the convergence speed of the model. Finally, the model  
333 distribution is relatively stable, so it is difficult to learn new features from ground-based cloud image data, and the  
334 learning rate linearly approaches to zero, keeping the model stable and easily obtaining local optima.

## 335 3. Dataset and Experimental Settings

336 This section introduces two kinds of ground-based cloud image classification datasets, MGCD and GRSCD, and  
337 describes the relevant experimental Settings. Subsection 3.1 describes MGCD and GRSCD in detail, and Subsection  
338 3.2 details experimental setting parameters and model evaluation indices.

### 339 3.1 Ground-Based Cloud Image Dataset

#### 340 3.1.1 Introduction to MGCD Dataset

341 Multi-modal Ground-based Cloud image Dataset (MGCD) is the first ground-based cloud image classification dataset  
342 composed of ground-based cloud images and multi-modal information, which was collected by the School of  
343 Electronics and Communication Engineering of Tianjin Normal University and the Meteorological Observation  
344 Center of Beijing Meteorological Bureau of China from 2017 to 2018. There are 8000 ground-based cloud images in  
345 MGCD, and 4000 ground-based cloud images in the training set and testing set, including altocumulus (Ac), cirrus  
346 (Ci), clear sky (Cs), cumulonimbus (Cb), cumulus (Cu), stratocumulus (Sc), and mix (Mx). In addition, cloud images  
347 with a cloud cover of less than 10% are classified as clear sky, and each ground-based cloud image sample contains  
348 ground-based cloud images taken at the same time and captured multimodal information. Among them, the ground-  
349 based cloud images are collected by an all-sky camera with a fisheye lens, and its data storage format is JPEG with a  
350 resolution of  $1024 \times 1024$  pixels; Multimodal information is collected by weather stations, including temperature,  
351 humidity, pressure, and wind speed, and these four elements are stored in the same vector. Figure 11 is a partial sample  
352 diagram of the MGCD dataset, and the specific information is shown in Table 2.

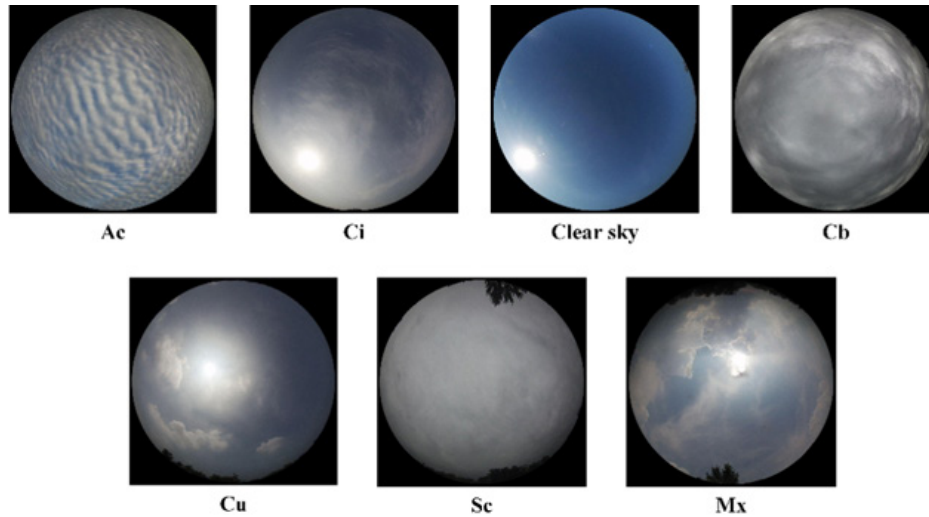

**Figure 11: Sample legend of MGCD dataset (Liu et al., 2020a).**

**Table 2.** MGCD dataset-specific information.

| No    | Class | Training | Testing | Total |
|-------|-------|----------|---------|-------|
| 1     | Ac    | 365      | 366     | 731   |
| 2     | Ci    | 662      | 661     | 1323  |
| 3     | Cs    | 669      | 669     | 1338  |
| 4     | Cb    | 593      | 594     | 1187  |
| 5     | Cu    | 719      | 719     | 1438  |
| 6     | Sc    | 482      | 481     | 963   |
| 7     | Mx    | 510      | 510     | 1020  |
| Total |       | 4000     | 4000    | 8000  |

### 3.1.2 Introduction to GRSCD Dataset

Ground remote sensing cloud dataset (GRSCD) is a ground-based cloud image classification dataset composed of ground-based cloud images and multimodal information. It was collected by the College of Electronic and Communication Engineering of Tianjin Normal University and the Meteorological Observation Center of Beijing Meteorological Administration of China from 2017 to 2018. There are 8000 ground-based cloud images in GRSCD, 4000 ground-based cloud images in the training set, and 4000 ground-based cloud images in the testing set. There are seven types of clouds, including altocumulus (Ac), cirrus (Ci), clear sky (Cs), cumulonimbus (Cb), cumulus (Cu), stratocumulus (Sc), and mix (Mx). In addition, cloud images with less than 10% cloud cover are classified as clear skies. Each ground-based cloud image sample contains ground-based cloud images taken at the same time and captured multimodal information. Among them, the ground-based cloud images are acquired by the whole sky camera with a fish-eye lens, and its data storage format is JPEG with a resolution of 1024×1024 pixels. Multi-modal information, including temperature, humidity, pressure, and wind speed, is collected by weather stations and stored in the same vector. Figure 12 depicts a partial sample of the GRSCD dataset. The specific data are listed in Table 3.

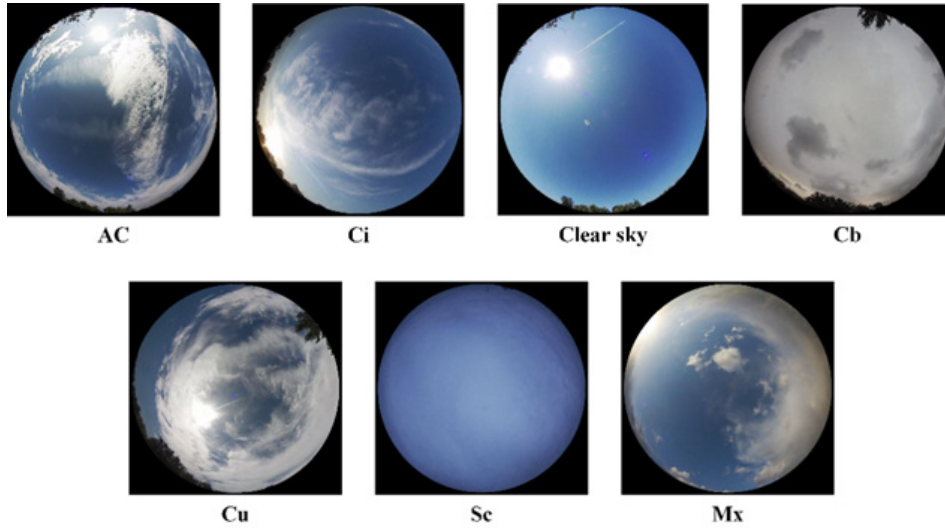

Figure 12: Sample legend of GRSCD dataset (Liu et al., 2020b).

Table 3. GRSCD dataset-specific information

| No    | Class | Training | Testing | Total |
|-------|-------|----------|---------|-------|
| 1     | Ac    | 400      | 331     | 731   |
| 2     | Ci    | 650      | 673     | 1323  |
| 3     | Cs    | 650      | 688     | 1338  |
| 4     | Cb    | 600      | 587     | 1187  |
| 5     | Cu    | 690      | 748     | 1438  |
| 6     | Sc    | 500      | 463     | 963   |
| 7     | Mx    | 510      | 510     | 1020  |
| Total |       | 4000     | 4000    | 8000  |

## 3.2 Experimental Setting

### 3.2.1 Implementation Details

All experiments in this paper adopt Python programming language and run on Intel(R) Core (TM) i9-12700K CPU @ 3.60GHz. NVIDIA GeForce RTX 3090 24G Graphical Processing Unit (GPU) platform and uses Pytorch as a deep learning framework. The CNN experiment is trained on the ground-based cloud image classification datasets MGCD and GRSCD respectively. The number of training data accounts for 50%, the initial learning rate is set to 0.0002, Batchsize is set to 32, and Adam optimizer (Kingma and Ba, 2015) is used to optimize all available parameters in the network. In addition, to improve the generalization ability of the CNN model and the convergence speed of the experiment, the transfer learning method is adopted in the training stage, and model parameters are obtained by training RepVGG with the ground-based cloud image classification dataset made by the team and used as the weight of pre-training. CNN experiment directly trains based on pre-training weight, which can accelerate the model



383 convergence speed and shorten the training time, avoid the problem of parameter overfitting, and promote the rapid  
384 gradient decline.

### 385 3.2.2 Evaluation Index

386 To objectively evaluate the ground-based cloud image classification performance of CloudRVE and other CNN  
387 models, the accuracy rate, accuracy rate, recall rate, and the average values of different indices of 7 types of clouds in  
388 MGCD and GRSCD datasets are calculated in the experiment, which is used as evaluation indices of CNN model.  
389 The average accuracy rate is derived based on positive and negative samples, and the calculation process is as follows:

$$390 \text{ Accuracy}(Acc) = \frac{1}{n} \sum_{i=1}^n \frac{TP+TN}{TP+TN+FP+FN} \quad (15)$$

391 True Positive (TP) parameter indicates the sample that is correctly classified as the cloud genus, True Negative  
392 (TN) indicates the sample that is correctly classified as another cloud genus, and False Positive (FN) indicates the  
393 sample that is incorrectly classified as the cloud genus. False Positive (FP) parameter indicates the number of  
394 misclassified samples of other cloud genera. The average accuracy rate and average recall rate can be expressed as:

$$395 \text{ Precision}(Pr) = \frac{1}{n} \sum_{i=1}^n \frac{TP}{TP+FP} \quad (16)$$

$$396 \text{ Recall}(Re) = \frac{1}{n} \sum_{i=1}^n \frac{TP}{TP+FN} \quad (17)$$

397 In addition, the average specificity and average F1\_score are also used as evaluation indices of the CNN model in  
398 the experiment, and their expressions are shown as follows:

$$399 \text{ Specificity}(TNR) = \frac{1}{n} \sum_{i=1}^n \frac{TN}{FP+TN} \quad (18)$$

$$400 \text{ F1\_score}(F1) = \frac{1}{n} \sum_{i=1}^n \frac{2 \times Pr \times Re}{Pr + Re} \quad (19)$$

## 401 4. Experimental Results and Discussion

### 402 4.1 Classification Results of Ground-Based Cloud Images

403 The overall classification accuracy of the CloudRVE method proposed in this paper in MGCD and GRSCD datasets  
404 and the classification results of each cloud genus are listed in Tables 4 and 5. It can be seen that the accuracy of  
405 CloudRVE in MGCD and GRSCD datasets reached 98.15 and 98.07%, respectively. The characteristics of the Cs in  
406 MGCD and GRSCD datasets were easy to identify, resulting in the accuracy rate, recall rate, specificity, and F1 value  
407 reaching 100%. In the MGCD dataset, the accuracy rate, recall rate, and F1 value of the other six cloud genera all  
408 exceeded 95.00%, and the specificity was above 99.50%. The accuracy and specificity of the Ci were the highest,  
409 reaching 98.64 and 99.73%, respectively. Cu had the highest recall rate and F1 value, reaching 99.17 and 98.89%,

respectively. In addition, the recall rate and F1 value of Sc and Mx were about 2.00% lower than other cloud genera, mainly their characteristics in the MGCD dataset were similar to those of Cb and Ci, respectively, reducing CloudRVE’s ability to classify them.

**Table 4.** Classification results for the MGCD dataset.

| Genus | Acc (%) | Pr (%) | Re (%) | TNR (%) | F1 (%) |
|-------|---------|--------|--------|---------|--------|
| Cu    | 98.15   | 98.62  | 99.17  | 99.70   | 98.89  |
| Ac    |         | 97.02  | 98.08  | 99.70   | 97.55  |
| Ci    |         | 98.64  | 98.94  | 99.73   | 98.79  |
| Cs    |         | 100.0  | 100.0  | 100.0   | 100.0  |
| Sc    |         | 97.26  | 95.84  | 99.63   | 96.54  |
| Cb    |         | 97.13  | 97.13  | 99.51   | 97.13  |
| Mx    |         | 97.24  | 96.67  | 99.60   | 96.95  |

**Table 5.** Classification results for the GRSCD dataset.

| Genus | Acc (%) | Pr (%) | Re (%) | TNR (%) | F1 (%) |
|-------|---------|--------|--------|---------|--------|
| Cu    | 98.07   | 99.30  | 99.03  | 99.85   | 99.16  |
| Ac    |         | 94.24  | 98.63  | 99.39   | 96.39  |
| Ci    |         | 97.91  | 99.24  | 99.58   | 98.57  |
| Cs    |         | 100.0  | 100.0  | 100.0   | 100.0  |
| Sc    |         | 98.10  | 96.47  | 99.74   | 97.27  |
| Cb    |         | 97.33  | 98.48  | 99.53   | 97.90  |
| Mx    |         | 97.74  | 93.33  | 99.68   | 95.49  |

In the GRSCD dataset, the accuracy rate, recall rate, and F1 value of the other six cloud genera exceeded 94.00%, and the specificity as over 99.30%. Cu had the highest accuracy, specificity, and F1 value, reaching 99.30, 99.85, and 99.16%. The recall rate of Ci was the highest, reaching 99.17%. In addition, the Ac accuracy was only 94.24%, mainly because Ac contained a small amount of Sc, and CloudRVE could easily to misjudge Ac as Sc or Mx. Mx contained a variety of other clouds, and the images composition was complex. Cloud clusters of different can genera varied in size and shape, resulting in lower recall rate and F1 values.

Figure 13 shows the confusion matrix of MGCD and GRSCD datasets, showing CloudRVE prediction results on MGCD and GRSCD datasets. The horizontal axis represents the true cloud image classification, while the vertical axis represents the predicted cloud image classification, where the value of the diagonal element represents the correct number of cloud image classifications and the value of the off-diagonal element represents the number of cloud image classification errors. As can be seen from Figure 13(a), in the MGCD dataset, the correct classification of the Cu is the largest, while the misclassification of the cloud images mainly comes from Sc and Mx. The reason is that the cloud base of Sc is blackened by illumination, making it easily confused with Cb. In addition, the dynamic change of cloud

will lead to a change in the viewpoint of the whole sky camera, thus increasing the difficulty of cloud genus identification. As can be seen in Figure 13(b), in the GRSCD dataset, the correctly classified cloud images of the same Cu had the largest number, while the incorrectly classified ones mainly came from Mx and Sc. The Mx cloud is a hybrid cloud, containing a variety of different cloud genera, with large shares of Ac, Ci, and Cu, which could be erroneously classified as Mx. Similarly, Sc could be taken for Cb, due to their similar features, impeding the correct identification.

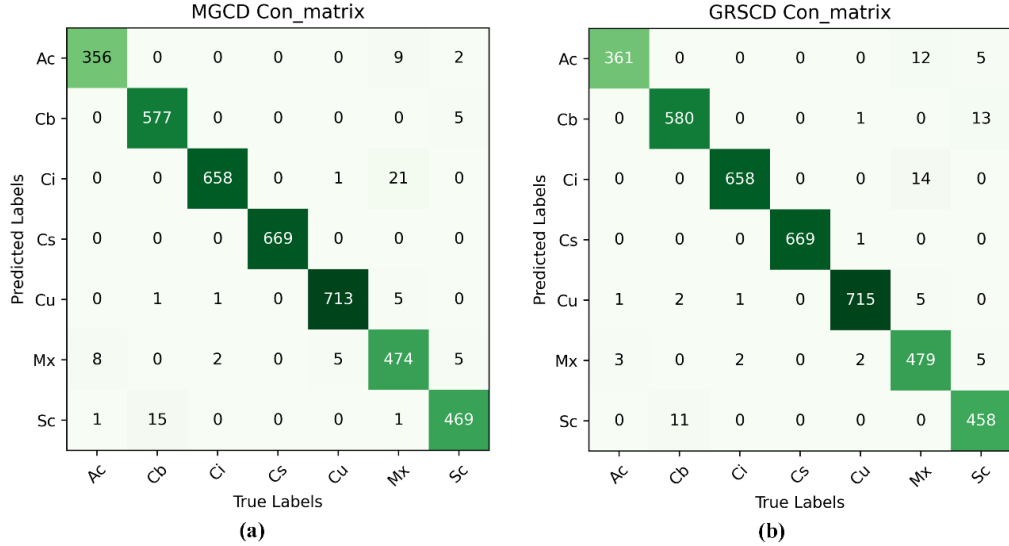

Figure 13: Confusion matrix images. (a)MGCD confusion matrix image. (b) GRSCD confusion matrix image.

## 4.2. Ablation Experiment

In this section, the ablation experiment is used to compare the original structure and different improvement stages of the proposed method on the MGCD and GRSCD datasets respectively, and the results are shown in Table 6. RepVGG\_M is the main improved network, ECA is the attention module, CloudRVE is the combined improved network of RepVGG\_M and NECA, and is the final version of the method proposed in this paper. It can be seen from the data in the table that the performance of each improvement stage of the network model is improved compared to the previous stage, which not only verifies the feasibility of extracting more cloud image detail features by adding 1×1 convolutional layer branches but also verifies that NECA can effectively improve the noise suppression ability and enhance the channel feature extraction ability. Compared with the original network structure, the accuracy of CloudRVE in the MGCD dataset increased by 2.58%, the average accuracy rate increased by 2.68%, the average recall rate increased by 2.99%, the average specificity increased by 0.42%, and the average F1 value increased by 2.69%. In the GRSCD dataset, the accuracy rate increased by 2.65%, the average accuracy rate increased by 2.81%, the average specificity increased by 0.44%, and the average F1 value increased by 2.69%. Therefore, it can be seen from the data display that the method proposed in this paper has the best performance.

**Table 6.** Results of the ablation experiment.

| Dataset | Model           | Acc (%)      | Pr (%)       | Re (%)       | TNR (%)      | F1 (%)       |
|---------|-----------------|--------------|--------------|--------------|--------------|--------------|
| MGCD    | RepVGG          | 95.57        | 95.31        | 94.99        | 99.26        | 95.14        |
|         | RepVGG_M        | 95.97        | 95.65        | 95.67        | 99.33        | 95.56        |
|         | RepVGG_M+ECA    | 96.80        | 96.60        | 96.37        | 99.47        | 96.45        |
|         | <b>CloudRVE</b> | <b>98.15</b> | <b>97.99</b> | <b>97.98</b> | <b>99.68</b> | <b>97.83</b> |
| GRSCD   | RepVGG          | 95.42        | 94.99        | 94.88        | 99.24        | 94.92        |
|         | RepVGG_M        | 95.70        | 95.46        | 95.30        | 99.29        | 95.36        |
|         | RepVGG_M+ECA    | 96.10        | 95.67        | 95.74        | 99.35        | 95.68        |
|         | <b>CloudRVE</b> | <b>98.07</b> | <b>97.80</b> | <b>97.88</b> | <b>99.68</b> | <b>97.82</b> |

451 To visually compare the performance of the original structure and the method proposed in this paper in different  
452 improvement stages, we visualize the features by extracting the feature map of the middle layer of the network and  
453 then explain the feature extraction ability of the original structure and the method proposed in this paper in different  
454 improvement stages, as shown in Figures 14 and 15. The method generates a rough feature map to display the  
455 important region of the predicted images through the parameter weights generated by network training, in which the  
456 brighter the region indicates the higher its importance, and the darker the region represents the sky or those that cannot  
457 be extracted. Figure 14 shows that CloudRVE has the best feature location and extraction ability by showing the  
458 feature maps of three different cloud images in the MGCD dataset. Figure 15 shows that the three cloud images of the  
459 GRSCD dataset include not only clouds and sky but also strong sunlight, which affects the classification accuracy of  
460 the model. However, it can be seen from the feature maps that CloudRVE not only has the best feature extraction  
461 ability but also has a strong ability to suppress noise such as sunlight.

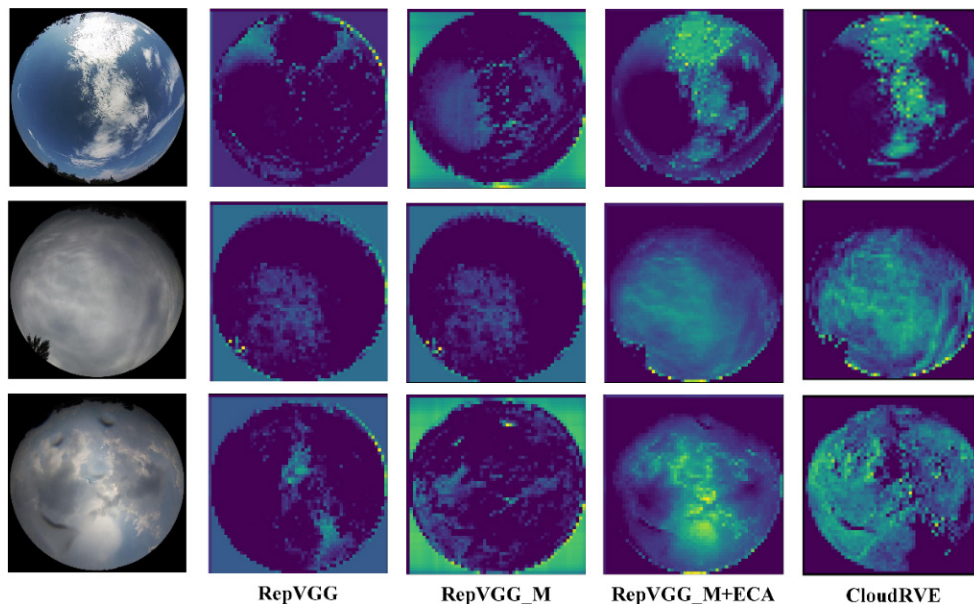

462

463 **Figure 14: Feature extraction of different models based on MGCD (Liu et al., 2020a).**

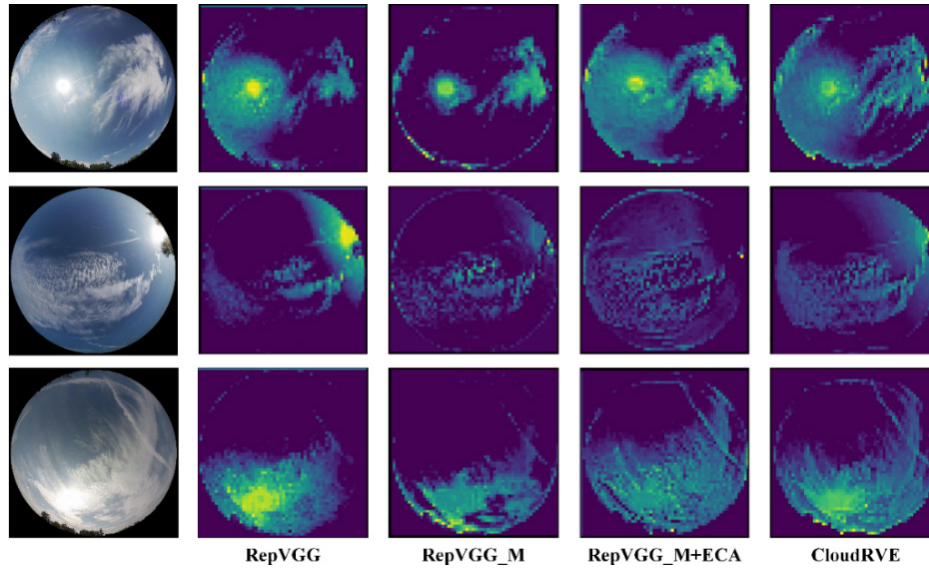

465

466 **Figure 15: Feature extraction of different models based on GRSCD (Liu et al., 2020b).**467 **4.3 Comparison of Experimental Results**

468 To verify the feasibility of the proposed CloudRVE method, we compared it with other advanced methods, including  
 469 CloudNet (Zhang et al., 2018), CloudA (Wang et al., 2020), Eff-Swin-T (Li et al., 2022), and other ground-based  
 470 cloud image classification methods. These included such classic CNN models as VGG16 (Szegedy et al., 2015),  
 471 ResNet50 (He et al., 2016), ShuffleNet (Zhang et al., 2018) and EfficientNet (Tan and Le, 2019). In addition, we  
 472 compared it with other Transformer-based classification models such as ViT-L (Dosovitskiy et al., 2022), Swin-T(Liu  
 473 et al., 2021), etc. Figures 16 and 17 illustrate the performances of different methods by displaying the training accuracy  
 474 and training loss curves of MGCD and GRSCD datasets. Here the black bold curve represents the CloudRVE method,  
 475 which has the largest accuracy value, the fastest convergence rate, the smallest loss rate, and the fastest decline rate  
 476 in the training stage. This strongly indicates that the CloudRVE method has the best classification performance of  
 477 ground-based cloud images.

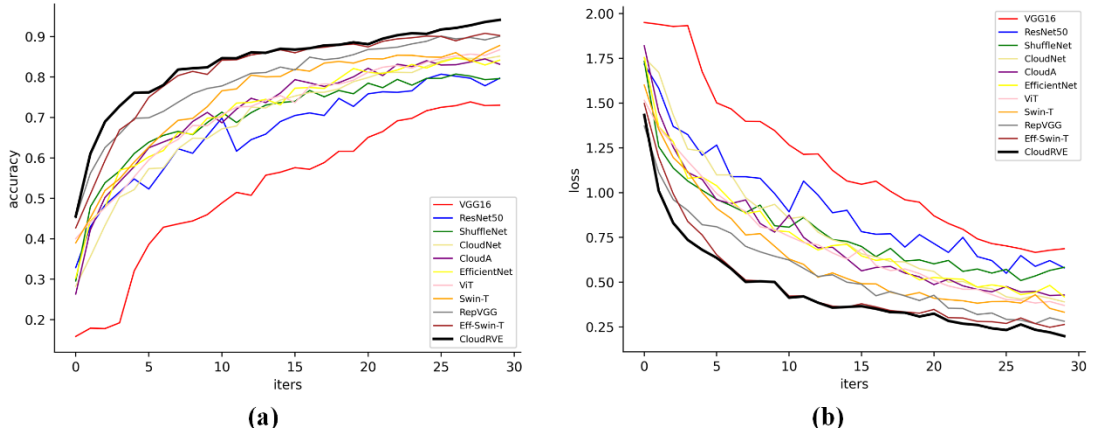

**Figure 16: Training accuracy (a) and training loss (b) curves of the MGCD dataset.**

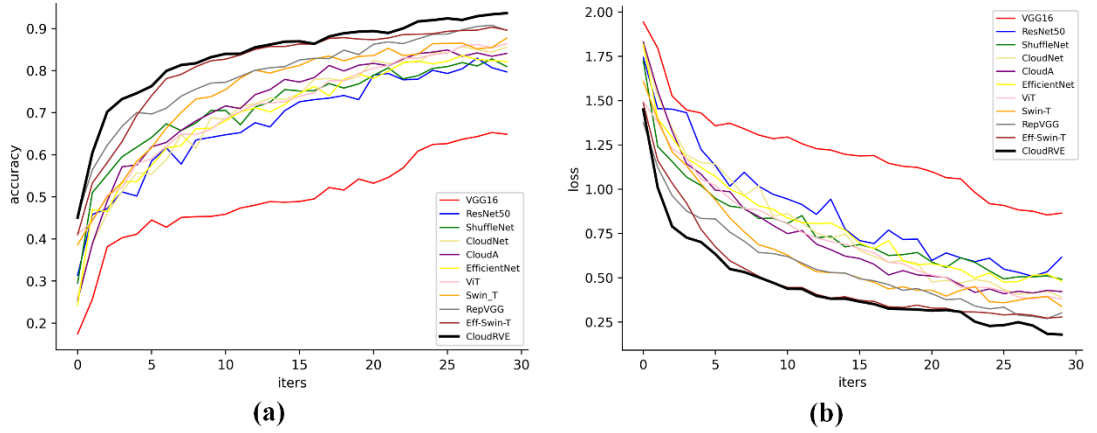

**Figure 17: Training accuracy (a) and training loss (b) curves of the GRSCD dataset.**

The comparative analysis results of the above methods are summarized in Table 7. It can be seen from the experimental results that RepVGG had the best performance among the CNN-based methods. The accuracy rate, accuracy rate, recall rate, specificity, and F1 value for the MGCD dataset reached 95.57, 95.31, 94.99, 99.26, and 95.14%, respectively, while those for the GRSCD dataset were 95.42, 94.99, 94.88, 99.24, and 94.92%, respectively. Ground-based cloud images have more texture features and deep semantic features than other images, and more image features need to be obtained to meet the classification requirements of such images. In recent years, Transformer has been widely used for image processing tasks due to its strong feature extraction capability. Several scholars have improved the Transformer derivative model through continuous exploration. Among them, Eff-Swin-T was an improvement based on Swin-T, and its performance on MGCD and GRSCD datasets was better than that of the classic CNN model. Its accuracy rate, accuracy rate, recall rate, specificity, and F1 value reached 96.93, 96.73, 96.44, 99.49, 96.56%, and 95.62, 95.41, 95.11, 99.27, 95.21%, respectively. Compared with Transformer and classical networks,

the proposed method had much better classification performance of ground-based cloud images. For different cloud image classification datasets, it exhibited excellent generalization ability and strong robustness, which is instrumental in photovoltaic power generation prediction.

**Table 7.** Comparison of experimental results.

| Method          | MGCD         |              |              |              |              | GRSCD        |              |              |              |              |
|-----------------|--------------|--------------|--------------|--------------|--------------|--------------|--------------|--------------|--------------|--------------|
|                 | Acc (%)      | Pr (%)       | Re (%)       | TNR (%)      | F1 (%)       | Acc (%)      | Pr (%)       | Re (%)       | TNR (%)      | F1 (%)       |
| VGG-16          | 78.25        | 77.04        | 75.52        | 96.36        | 75.55        | 73.50        | 73.88        | 70.29        | 95.53        | 70.87        |
| ResNet-50       | 85.98        | 85.24        | 84.55        | 97.67        | 84.82        | 86.51        | 85.56        | 85.38        | 97.75        | 85.34        |
| ShuffleNet      | 86.95        | 86.08        | 85.68        | 97.83        | 85.71        | 86.99        | 86.85        | 85.18        | 97.82        | 85.71        |
| CloudNet        | 90.01        | 89.24        | 89.08        | 98.34        | 89.13        | 89.60        | 89.06        | 88.60        | 98.27        | 88.79        |
| CloudA          | 89.62        | 88.78        | 88.50        | 98.28        | 88.61        | 90.03        | 89.54        | 88.71        | 98.34        | 89.03        |
| EfficientNet    | 91.17        | 90.66        | 90.22        | 98.53        | 90.27        | 90.10        | 89.68        | 88.92        | 98.35        | 89.13        |
| ViT-L           | 91.11        | 90.91        | 90.21        | 98.55        | 90.40        | 90.98        | 90.49        | 90.33        | 98.50        | 90.39        |
| Swin-T          | 92.87        | 92.44        | 91.63        | 98.63        | 91.76        | 93.55        | 93.22        | 92.87        | 98.93        | 92.71        |
| RepVGG          | 95.57        | 95.31        | 94.99        | 99.26        | 95.14        | 95.42        | 94.99        | 94.88        | 99.24        | 94.92        |
| Eff-Swin-T      | 96.93        | 96.73        | 96.44        | 99.49        | 96.56        | 95.62        | 95.41        | 95.11        | 99.27        | 95.21        |
| <b>CloudRVE</b> | <b>98.15</b> | <b>97.99</b> | <b>97.98</b> | <b>99.68</b> | <b>97.83</b> | <b>98.07</b> | <b>97.80</b> | <b>97.88</b> | <b>99.68</b> | <b>97.82</b> |

The space complexities of CloudRVE and ten alternative methods are summarized and compared in Table 8. It can be seen from the table that CloudRVE had a spatial complexity of 105.17 Mb, which is in line with the spatial complexity of Swin-T and Eff-Swin-T, and far less than the spatial complexity of ViT-L. The spatial complexity of CloudRVE exceeded that of RepVGG by three times, achieving the best ground cloud image classification performance. Thus, CloudRVE achieved excellent ground cloud image classification performance at the expense of higher spatial complexity.

**Table 8.** Space complexity of the proposed and ten alternative methods.

| Method          | Space complexity (Mb) |
|-----------------|-----------------------|
| VGG-16          | 512.28                |
| ResNet-50       | 90.03                 |
| ShuffleNet      | 4.93                  |
| CloudNet        | 153.36                |
| CloudA          | 87.57                 |
| EfficientNet    | 15.61                 |
| ViT-L           | 327.37                |
| Swin-T          | 105.28                |
| RepVGG          | 30.10                 |
| Eff-Swin-T      | 105.24                |
| <b>CloudRVE</b> | <b>105.17</b>         |



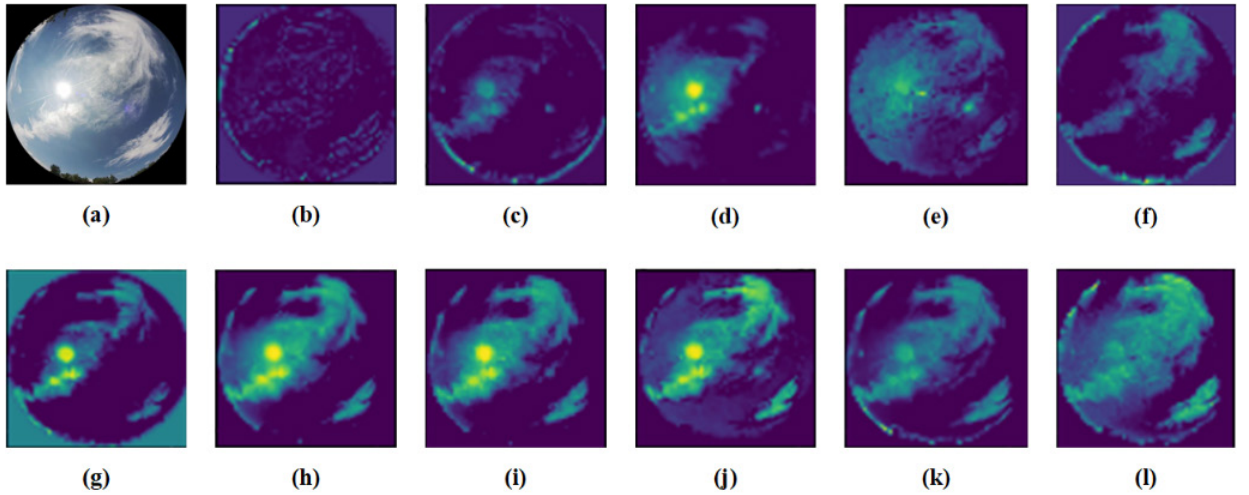

Figure 18: Feature extraction of different methods based on MGCD, (a) Original (Liu et al., 2020a); (b)VGG-16; (c) ResNet-50; (d) ShuffleNet; (e) CloudNet; (f) CloudA; (g) EfficientNet; (h) ViT-L; (i) Swin-T; (j) RepVGG; (k) Eff-Swin-T; (l) CloudRVE

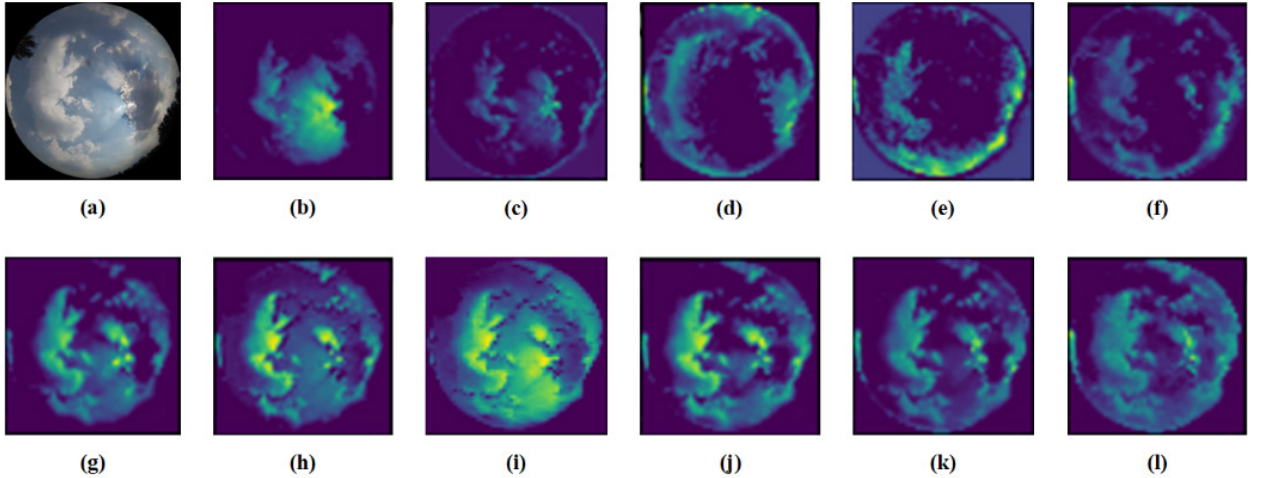

Figure 19: Feature extraction of different methods based on GRSCD: (a) Original (Liu et al., 2020b); (b)VGG-16; (c)ResNet-50; (d) ShuffleNet; (e) CloudNet; (f) CloudA; (g) EfficientNet; (h) ViT-L; (i) Swin-T; (j) RepVGG; (k) Eff-Swin-T; (l) CloudRVE

In order to provide a more intuitive display of the advantages of CloudRVE over other advanced methods, we extracted the features of the intermediate layers of different methods to generate the ground cloud feature maps for the building foundation, demonstrating the strong feature extraction capabilities of CloudRVE and proving its superiority, as shown in Figures 18 and 19. Feature extraction was achieved by generating rough feature maps through network training with parameter weights to highlight the important regions of predicted images. The light colored regions represent the important features, while the dark colored regions represent the sky or unsuccessfully extracted features. Figure 18(b-i) shows the feature maps of different ground cloud classification methods based on MGCD



dataset to demonstrate the CloudRVE capability to extract more extensive and comprehensive cloud features and suppress the black regions and sunlight, further illustrating the best feature localization and extraction capability of CloudRVE. Figure 19(b-i) shows the feature maps of different ground cloud classification methods based on GRSCD dataset to demonstrate that the cloud feature extracted by CloudRVE covers the effective area in Figure 19(a) with the best coverage and the best suppression of the sunlight, further proving that CloudRVE has the best feature localization and extraction capabilities.

## 5. Conclusion

This study proposed a new classification method called CloudRVE (Cloud Representative Volume Element Network) for ground-based cloud images based on the improved RepVGG network. In particular, its training stage structure was improved, the residual structure was broadened, and  $1 \times 1$  convolutional layer branches were added to each block, extending the gradient information of the topology structure and enhancing the network ability to represent boundary features of cloud images. In addition, the NECA (New Efficient Channel Attention) module was embedded after multi-branch fusion to learn the feature relationship between sequences, improve the network cross-channel interaction ability, and extract the best global features of cloud images. We validated the excellent performance of the proposed method on MGCD and GRSCD ground-based cloud image datasets, achieving the classification accuracy values of 98.15 and 98.07%, respectively, which outperformed ten other advanced methods. The particular contributions of this paper were summarized in Section 1. However, this study shares some limitations with other methods of classifying ground-based cloud images via convolutional neural networks, which have reached a bottleneck due to continuous expansion of the capacity of ground-based cloud image datasets. A lucrative alternative is Transformer, which got a high reputation of a powerful deep neural network for processing sequences but has received little attention in ground-based cloud image classification. On the other hand, cloud classification is only based on ground-based cloud image features, while many physical features, such as height, thickness, etc., may be also used. Our follow-up study envisages combining CNN and Transformer models and using cloud height, cloud thickness, and other parameters in ground-based cloud image classification to improve the model's performance.

**Author Contributions.** LH performed the experiments and wrote the paper. CS, KZ, and HX analyzed the data and designed the experiments. CS conceived the method and reviewed the paper. XL, ZS, and XZ reviewed the paper and gave constructive suggestions.

**Financial support.** This research was funded by the National Science Foundation of China (NSFC) under Grant No. 62076093 and No. 62206095 and through the Fundamental Research Funds for the Central Universities of China under Grant No. 2022MS078 and No. 2020MS099.

552 **Data Availability Statement.** The MGCD dataset was accessed from <https://github.com/shuangliutjnu/Multimodal->  
553 <https://github.com/shuangliutjnu/TJNU->  
554 [Ground-based-Remote-Sensing-Cloud-Database.](https://github.com/shuangliutjnu/TJNU-)

555

556 **Acknowledgments.** We would like to thank Professor Liu Shuang of Tianjin Normal University for providing the  
557 support of ground-based cloud image classification datasets and Student Meng Ru-oxuan from Guangxi Normal  
558 University for her contribution to this paper.

559

560 **Declaration of Competing Interests.** The authors declare that they have no conflict of interest.

## 561 **References**

- 562 Alonso-Montesinos, J., Martinez-Durban, M., del Sagrado, J., del Aguila, I. M., and Batlles, F. J.: The application of  
563 Bayesian network classifiers to cloud classification in satellite images, *Renew. Energy*, 97, 155–161,  
564 <https://doi.org/10.1016/j.renene.2016.05.066>, 2016.
- 565 Calbó, J. and Sabburg, J.: Feature Extraction from Whole-Sky Ground-Based Images for Cloud-Type Recognition, *J.*  
566 *Atmospheric Ocean. Technol.*, 25, 3–14, <https://doi.org/10.1175/2007JTECHA959.1>, 2008.
- 567 Cazorla, A., Olmo, F. J., and Alados-Arboledas, L.: Development of a sky imager for cloud cover assessment, *JOSA*  
568 *A*, 25, 29–39, <https://doi.org/10.1364/JOSAA.25.000029>, 2008.
- 569 Ding, X., Zhang, X., Ma, N., Han, J., Ding, G., and Sun, J.: RepVGG: Making VGG-style ConvNets Great Again, in:  
570 2021 IEEE/CVF Conference on Computer Vision and Pattern Recognition (CVPR), 2021 IEEE/CVF Conference on  
571 Computer Vision and Pattern Recognition (CVPR), 13728–13737, <https://doi.org/10.1109/CVPR46437.2021.01352>,  
572 2021.
- 573 Dosovitskiy, A., Beyer, L., Kolesnikov, A., Weissenborn, D., Zhai, X., Unterthiner, T., Dehghani, M., Minderer, M.,  
574 Heigold, G., Gelly, S., Uszkoreit, J., and Houlsby, N.: An Image is Worth 16x16 Words: Transformers for Image  
575 Recognition at Scale, *International Conference on Learning Representations*, 1909, 2022.
- 576 Fabel, Y., Nouri, B., Wilbert, S., Blum, N., Triebel, R., Hasenbalg, M., Kuhn, P., Zarzalejo, L. F., and Pitz-Paal, R.:  
577 Applying self-supervised learning for semantic cloud segmentation of all-sky images, *Atmospheric Meas. Tech.*, 15,  
578 797–809, <https://doi.org/10.5194/amt-15-797-2022>, 2022.
- 579 Goren, T., Rosenfeld, D., Sourdeval, O., and Quaas, J.: Satellite Observations of Precipitating Marine Stratocumulus  
580 Show Greater Cloud Fraction for Decoupled Clouds in Comparison to Coupled Clouds, *Geophys. Res. Lett.*, 45,  
581 5126–5134, <https://doi.org/10.1029/2018GL078122>, 2018.

582 Gorodetskaya, I. V., Kneifel, S., Maahn, M., Van Tricht, K., Thiery, W., Schween, J. H., Mangold, A., Crewell, S.,  
583 and Van Lipzig, N. P. M.: Cloud and precipitation properties from ground-based remote-sensing instruments in East  
584 Antarctica, *The Cryosphere*, 9, 285–304, <https://doi.org/10.5194/tc-9-285-2015>, 2015.

585 Gyasi, E. K. and Swarnalatha, P.: Cloud-MobiNet: An Abridged Mobile-Net Convolutional Neural Network Model  
586 for Ground-Based Cloud Classification, *Atmosphere*, 14, 280, <https://doi.org/10.3390/atmos14020280>, 2023.

587 He, K., Zhang, X., Ren, S., and Sun, J.: Deep Residual Learning for Image Recognition, in: 2016 IEEE Conference  
588 on Computer Vision and Pattern Recognition (CVPR), 2016 IEEE Conference on Computer Vision and Pattern  
589 Recognition (CVPR), 770–778, <https://doi.org/10.1109/CVPR.2016.90>, 2016.

590 He, T., Zhang, Z., Zhang, H., Zhang, Z., Xie, J., and Li, M.: Bag of Tricks for Image Classification with Convolutional  
591 Neural Networks, 2019 IEEE/CVF Conference on Computer Vision and Pattern Recognition (CVPR), Los Alamitos,  
592 558–567, <https://doi.org/10.1109/CVPR.2019.00065>, 2019.

593 Heinle, A., Macke, A., and Srivastav, A.: Automatic cloud classification of whole sky images, *Atmospheric Meas.*  
594 *Tech.*, 3, 557–567, <https://doi.org/10.5194/amt-3-557-2010>, 2010.

595 Hu, J., Shen, L., and Sun, G.: Squeeze-and-Excitation Networks, in: 2018 IEEE/CVF Conference on Computer Vision  
596 and Pattern Recognition, 2018 IEEE/CVF Conference on Computer Vision and Pattern Recognition, 7132–7141,  
597 <https://doi.org/10.1109/CVPR.2018.00745>, 2018.

598 Ioffe, S. and Szegedy, C.: Batch Normalization: Accelerating Deep Network Training by Reducing Internal Covariate  
599 Shift, in: *International Conference on Machine Learning*, Vol 37, San Diego, 448–456, 2015.

600 Johnson, R., Hering, W., and Shields, J.: Automated Visibility & Cloud Cover Measurements with a Solid State  
601 Imaging System, Scripps Institution of Oceanography, Marine Physical Laboratory, University of California, San  
602 Diego, 1989.

603 Kalisch, J. and Macke, A.: Estimation of the total cloud cover with high temporal resolution and parametrization of  
604 short-term fluctuations of sea surface insolation, *Meteorol. Z.*, 603–611, [https://doi.org/10.1127/0941-](https://doi.org/10.1127/0941-2948/2008/0321)  
605 2948/2008/0321, 2008.

606 Kingma, D. P. and Ba, J.: Adam: A Method for Stochastic Optimization, 3rd International Conference for Learning  
607 Representations, San Diego, arXiv:1412.6980 [cs], <https://doi.org/10.48550/arXiv.1412.6980>, 2015.

608 Li, X., Qiu, B., Cao, G., Wu, C., and Zhang, L.: A Novel Method for Ground-Based Cloud Image Classification Using  
609 Transformer, *Remote Sens.*, 14, 3978, <https://doi.org/10.3390/rs14163978>, 2022.

610 Li, Z., Kong, H., and Wong, C.-S.: Neural Network-Based Identification of Cloud Types from Ground-Based Images  
611 of Cloud Layers, *Appl. Sci.*, 13, 4470, <https://doi.org/10.3390/app13074470>, 2023.

612 Lin, F., Zhang, Y., and Wang, J.: Recent advances in intra-hour solar forecasting: A review of ground-based sky  
613 image methods, *Int. J. Forecast.*, 39, 244–265, <https://doi.org/10.1016/j.ijforecast.2021.11.002>, 2023.

614 Liu, S., Li, M., Zhang, Z., Cao, X., and Durrani, T. S.: Ground-Based Cloud Classification Using Task-Based Graph  
615 Convolutional Network, *Geophys. Res. Lett.*, 47, e2020GL087338, <https://doi.org/10.1029/2020GL087338>, 2020a.

616 Liu, S., Li, M., Zhang, Z., Xiao, B., and Durrani, T. S.: Multi-Evidence and Multi-Modal Fusion Network for Ground-  
617 Based Cloud Recognition, *Remote Sens.*, 12, 464, <https://doi.org/10.3390/rs12030464>, 2020b.

618 Liu, S., Duan, L., Zhang, Z., Cao, X., and Durrani, T. S.: Multimodal Ground-Based Remote Sensing Cloud  
619 Classification via Learning Heterogeneous Deep Features, *IEEE Trans. Geosci. Remote Sens.*, 58, 7790–7800,  
620 <https://doi.org/10.1109/TGRS.2020.2984265>, 2020c.

621 Liu, S., Duan, L., Zhang, Z., Cao, X., and Durrani, T. S.: Ground-Based Remote Sensing Cloud Classification via  
622 Context Graph Attention Network, *IEEE Trans. Geosci. Remote Sens.*, 60, 1–11,  
623 <https://doi.org/10.1109/TGRS.2021.3063255>, 2022.

624 Liu, Z., Lin, Y., Cao, Y., Hu, H., Wei, Y., Zhang, Z., Lin, S., and Guo, B.: Swin Transformer: Hierarchical Vision  
625 Transformer using Shifted Windows, in: 2021 IEEE/CVF International Conference on Computer Vision (ICCV),  
626 2021 IEEE/CVF International Conference on Computer Vision (ICCV), Montreal, QC, Canada, 9992–10002,  
627 <https://doi.org/10.1109/ICCV48922.2021.00986>, 2021.

628 Long, C., Li, X., Jing, Y., and Shen, H.: Bishift Networks for Thick Cloud Removal with Multitemporal Remote  
629 Sensing Images, *Int. J. Intell. Syst.*, 2023, e9953198, <https://doi.org/10.1155/2023/9953198>, 2023.

630 Meng, Q., Zhao, S., Huang, Z., and Zhou, F.: MagFace: A Universal Representation for Face Recognition and Quality  
631 Assessment, in: 2021 IEEE/CVF Conference on Computer Vision and Pattern Recognition (CVPR), 2021 IEEE/CVF  
632 Conference on Computer Vision and Pattern Recognition (CVPR), 14220–14229,  
633 <https://doi.org/10.1109/CVPR46437.2021.01400>, 2021.

634 Norris, J. R., Allen, R. J., Evan, A. T., Zelinka, M. D., O'Dell, C. W., and Klein, S. A.: Evidence for climate change  
635 in the satellite cloud record, *Nature*, 536, 72–75, <https://doi.org/10.1038/nature18273>, 2016.

636 Nouri, B., Kuhn, P., Wilbert, S., Hanrieder, N., Prah, C., Zarzalejo, L., Kazantzidis, A., Blanc, P., and Pitz-Paal, R.:  
637 Cloud height and tracking accuracy of three all sky imager systems for individual clouds, *Sol. Energy*, 177, 213–228,  
638 <https://doi.org/10.1016/j.solener.2018.10.079>, 2019.

639 Pfister, G., McKenzie, R. L., Liley, J. B., Thomas, A., Forgan, B. W., and Long, C. N.: Cloud Coverage Based on  
640 All-Sky Imaging and Its Impact on Surface Solar Irradiance, *J. Appl. Meteorol. Climatol.*, 42, 1421–1434,  
641 [https://doi.org/10.1175/1520-0450\(2003\)042<1421:CCBOAI>2.0.CO;2](https://doi.org/10.1175/1520-0450(2003)042<1421:CCBOAI>2.0.CO;2), 2003.

642 Qu, Y., Xu, J., Sun, Y., and Liu, D.: A temporal distributed hybrid deep learning model for day-ahead distributed PV  
643 power forecasting, *Appl. Energy*, 304, 117704, <https://doi.org/10.1016/j.apenergy.2021.117704>, 2021.

644 Sarukkai, V., Jain, A., Uzgent, B., and Ermon, S.: Cloud Removal in Satellite Images Using Spatiotemporal  
645 Generative Networks, in: 2020 IEEE Winter Conference on Applications of Computer Vision (WACV), 2020 IEEE  
646 Winter Conference on Applications of Computer Vision (WACV), 1785–1794,  
647 <https://doi.org/10.1109/WACV45572.2020.9093564>, 2020.

648 Shi, C., Wang, C., Wang, Y., and Xiao, B.: Deep Convolutional Activations-Based Features for Ground-Based Cloud  
649 Classification, *IEEE Geosci. Remote Sens. Lett.*, 14, 816–820, <https://doi.org/10.1109/LGRS.2017.2681658>, 2017.

650 Shi, C., Zhou, Y., Qiu, B., He, J., Ding, M., and Wei, S.: Diurnal and nocturnal cloud segmentation of all-sky imager  
651 (ASI) images using enhancement fully convolutional networks, *Atmospheric Meas. Tech.*, 12, 4713–4724,  
652 <https://doi.org/10.5194/amt-12-4713-2019>, 2019.

653 Simonyan, K. and Zisserman, A.: Very Deep Convolutional Networks for Large-Scale Image Recognition,  
654 <https://doi.org/10.48550/arXiv.1409.1556>, 10 April 2015.

655 Singh, M. and Glennen, M.: Automated ground-based cloud recognition, *Pattern Anal. Appl.*, 8, 258–271,  
656 <https://doi.org/10.1007/s10044-005-0007-5>, 2005.

657 Szegedy, C., Liu, W., Jia, Y., Sermanet, P., Reed, S., Anguelov, D., Erhan, D., Vanhoucke, V., and Rabinovich, A.:  
658 Going deeper with convolutions, in: 2015 IEEE Conference on Computer Vision and Pattern Recognition (CVPR),  
659 2015 IEEE Conference on Computer Vision and Pattern Recognition (CVPR), 1–9,  
660 <https://doi.org/10.1109/CVPR.2015.7298594>, 2015.

661 Tan, M. and Le, Q. V.: EfficientNet: Rethinking Model Scaling for Convolutional Neural Networks, in: International  
662 Conference on Machine Learning, Vol 97, San Diego, 2019.

663 Tang, Y., Yang, P., Zhou, Z., Pan, D., Chen, J., and Zhao, X.: Improving cloud type classification of ground-based  
664 images using region covariance descriptors, *Atmospheric Meas. Tech.*, 14, 737–747, [https://doi.org/10.5194/amt-14-](https://doi.org/10.5194/amt-14-737-2021)  
665 [737-2021](https://doi.org/10.5194/amt-14-737-2021), 2021.

666 Taravat, A., Del Frate, F., Cornaro, C., and Vergari, S.: Neural Networks and Support Vector Machine Algorithms  
667 for Automatic Cloud Classification of Whole-Sky Ground-Based Images, *IEEE Geosci. Remote Sens. Lett.*, 12, 666–  
668 670, <https://doi.org/10.1109/LGRS.2014.2356616>, 2015.

669 Wang, M., Zhou, S., Yang, Z., and Liu, Z.: CloudA: A Ground-Based Cloud Classification Method with a  
670 Convolutional Neural Network, *J. Atmospheric Ocean. Technol.*, 37, 1661–1668, [https://doi.org/10.1175/JTECH-D-](https://doi.org/10.1175/JTECH-D-19-0189.1)  
671 [19-0189.1](https://doi.org/10.1175/JTECH-D-19-0189.1), 2020.

672 Wang, M., Zhuang, Z., Wang, K., Zhou, S., Zhou, S., and Liu, Z.: Intelligent classification of ground-based visible  
673 cloud images using a transfer convolutional neural network and fine-tuning, *Opt. Express*, 29, 41176–41190,  
674 <https://doi.org/10.1364/OE.442455>, 2021.

675 Wu, X., Zhan, C., Lai, Y.-K., Cheng, M.-M., and Yang, J.: A Large-Scale Benchmark Dataset for Insect Pest  
676 Recognition, in: 2019 IEEE/CVF Conference on Computer Vision and Pattern Recognition (CVPR), 2019 IEEE/CVF  
677 Conference on Computer Vision and Pattern Recognition (CVPR), Conference Location: Long Beach, CA, USA,  
678 8779–8788, <https://doi.org/10.1109/CVPR.2019.00899>, 2019.

679 Xiao, Y., Cao, Z., Zhuo, W., Ye, L., and Zhu, L.: mCLOUD: A Multiview Visual Feature Extraction Mechanism for  
680 Ground-Based Cloud Image Categorization, *J. Atmospheric Ocean. Technol.*, 33, 789–801,  
681 <https://doi.org/10.1175/JTECH-D-15-0015.1>, 2016.

682 Ye, L., Cao, Z., and Xiao, Y.: DeepCloud: Ground-Based Cloud Image Categorization Using Deep Convolutional  
683 Features, *IEEE Trans. Geosci. Remote Sens.*, 55, 5729–5740, <https://doi.org/10.1109/TGRS.2017.2712809>, 2017.

684 Yu, A., Tang, M., Li, G., Hou, B., Xuan, Z., Zhu, B., and Chen, T.: A Novel Robust Classification Method for Ground-  
685 Based Clouds, *Atmosphere*, 12, 999, <https://doi.org/10.3390/atmos12080999>, 2021.

686 Zhang, J., Liu, P., Zhang, F., and Song, Q.: CloudNet: Ground-Based Cloud Classification With Deep Convolutional  
687 Neural Network, *Geophys. Res. Lett.*, 45, 8665–8672, <https://doi.org/10.1029/2018GL077787>, 2018a.

688 Zhang, X., Zhou, X., Lin, M., and Sun, R.: ShuffleNet: An Extremely Efficient Convolutional Neural Network for  
689 Mobile Devices, in: 2018 Ieee/Cvf Conference on Computer Vision and Pattern Recognition (cvpr), New York, 6848–  
690 6856, <https://doi.org/10.1109/CVPR.2018.00716>, 2018b.

691 Zhang, Y., Liu, H., and Hu, Q.: TransFuse: Fusing Transformers and CNNs for Medical Image Segmentation, in:  
692 Medical Image Computing and Computer Assisted Intervention – MICCAI 2021, Cham, 14–24,  
693 [https://doi.org/10.1007/978-3-030-87193-2\\_2](https://doi.org/10.1007/978-3-030-87193-2_2), 2021.

694 Zhao, Z., Xu, G., Qi, Y., Liu, N., and Zhang, T.: Multi-patch deep features for power line insulator status classification  
695 from aerial images, in: 2016 International Joint Conference on Neural Networks (IJCNN), 2016 International Joint  
696 Conference on Neural Networks (IJCNN), 3187–3194, <https://doi.org/10.1109/IJCNN.2016.7727606>, 2016.

697 Zheng, Y., Rosenfeld, D., Zhu, Y., and Li, Z.: Satellite-Based Estimation of Cloud Top Radiative Cooling Rate for  
698 Marine Stratocumulus, *Geophys. Res. Lett.*, 46, 4485–4494, <https://doi.org/10.1029/2019GL082094>, 2019.

699 Zhong, B., Chen, W., Wu, S., Hu, L., Luo, X., and Liu, Q.: A Cloud Detection Method Based on Relationship Between  
700 Objects of Cloud and Cloud-Shadow for Chinese Moderate to High Resolution Satellite Imagery, *IEEE J. Sel. Top.*  
701 *Appl. Earth Obs. Remote Sens.*, 10, 4898–4908, <https://doi.org/10.1109/JSTARS.2017.2734912>, 2017.

702 Zhu, W., Chen, T., Hou, B., Bian, C., Yu, A., Chen, L., Tang, M., and Zhu, Y.: Classification of Ground-Based Cloud  
703 Images by Improved Combined Convolutional Network, *Appl. Sci.*, 12, 1570, <https://doi.org/10.3390/app12031570>,  
704 2022.

705 Zhuo, W., Cao, Z., and Xiao, Y.: Cloud Classification of Ground-Based Images Using Texture–Structure Features, *J.*  
706 *Atmospheric Ocean. Technol.*, 31, 79–92, <https://doi.org/10.1175/JTECH-D-13-00048.1>, 2014.

707
